**Title: Experimental warming reduces the diversity and functional potential of the *Sphagnum* microbiome**

**Running Head: Warming reduces *Sphagnum* microbiome diversity**

<sup>1,2</sup>Alyssa A. Carrell, <sup>3</sup>Max Kolton, <sup>4\*</sup>Melissa J. Warren, <sup>2</sup>Dale A. Pelletier, <sup>3</sup>Jennifer B. Glass, <sup>3,4</sup>Joel E. Kostka, <sup>5,6</sup>Paul J. Hanson, and <sup>2,6</sup>David J. Weston

**Author Affiliations:**

<sup>1</sup>Bredesen Center for Interdisciplinary Research and Graduate Education, University of Tennessee, Knoxville, TN 37996, USA

<sup>2</sup>Biosciences Division, Oak Ridge National Laboratory, Oak Ridge, TN, 37831, USA

<sup>3</sup>School of Biology, Georgia Institute of Technology, Atlanta, GA 30332, USA

<sup>4</sup>School of Earth and Atmospheric Sciences, Georgia Institute of Technology, Atlanta, Georgia, 30332, USA

<sup>5</sup>Environmental Sciences Division, Oak Ridge National Laboratory, Oak Ridge, TN, 37831, USA

<sup>6</sup>Climate Change Science Institute, Oak Ridge National Laboratory, Oak Ridge, TN, 37831, USA

\*Present address: CH2M, Atlanta, Georgia, 30328, USA

This manuscript has been authored by UT-Battelle, LLC under Contract No. DE-AC05-00OR22725 with the U.S. Department of Energy. The United States Government retains and the publisher, by accepting the article for publication, acknowledges that the United States Government retains a non-exclusive, paid-up, irrevocable, world-wide license to publish or reproduce the published form of this manuscript, or allow others to do so, for United States Government purposes. The Department of Energy will provide public access to these results of federally sponsored research in accordance with the DOE Public Access Plan (<http://energy.gov/downloads/doe-public-access-plan>).

Corresponding author:

Alyssa A. Carrell

Oak Ridge National Laboratory

Oak Ridge, TN 37831-6301

Phone: (865) 576-6783

Email: [carrellaa@ornl.gov](mailto:carrellaa@ornl.gov)

Word count – Abstract 200; Introduction 636; Main Text 2493; Discussion 1384; Acknowledgement 90; Total excluding references 4803

Number of references -81; Total number Figures- 3; Color Figures - 1; Tables - 2

## 1 **Abstract**

2 Climate change may reduce biodiversity leading to a reduction in ecosystem productivity.  
3 Despite numerous reports of a strong correlation of microbial diversity and ecosystem  
4 productivity, little is known about the warming effects on plant associated microbes. Here we  
5 explore the impact of experimental warming on the microbial and nitrogen-fixing (diazotroph)  
6 community associated with the widespread and ecologically relevant *Sphagnum* genus in a field  
7 warming experiment. To quantify changes in the abundance, diversity, and community  
8 composition of *Sphagnum* microbiomes with warming we utilized qPCR and Illumina sequencing  
9 of the 16S SSU rRNA and *nifH* gene. Microbial and diazotroph community richness and Shannon  
10 diversity decreased with warming ( $p < 0.05$ ). The diazotroph communities shifted from diverse  
11 communities to domination by primarily *Nostocaceae* (25% in control samples to 99% in  
12 elevated temperature samples). In addition, the nitrogen fixation activity measured with the  
13 acetylene reduction assay (ARA) decreased with warming treatment. This suggests the negative  
14 correlation of temperature and microbial diversity corresponds to a reduction in functional  
15 potential within the diazotroph community. The results indicate that climate warming may alter  
16 the community structure and function in peat moss microbiomes, with implications for impacts to  
17 host fitness and ecosystem productivity, and carbon uptake potential of peatlands.

18

## 19 **Keywords**

20 ***Sphagnum* microbiome; warming experiment; diazotroph diversity; simulated climate**  
21 **change; moss; microbial community**

22

23

24

## 25 **Introduction**

26 Climate change represents a large threat to the function and stability of ecosystems, potentially  
27 leading to altered abundance range shifts (Parmesan, 2006), and species extinction (Parmesan,  
28 2006; Bestion *et al.*, 2015) that ultimately result in decreased biodiversity. Despite years of  
29 research on the importance of diversity in driving the productivity and function in numerous  
30 ecosystems (Tilman *et al.*, 2012; Liang *et al.*, 2016; Kolton *et al.*, 2017; Laforest-Lapointe *et al.*,  
31 2017), the relationship of warming and biodiversity remains unclear in many ecosystems. The  
32 majority of research on biodiversity and warming has focused mainly on multicellular eukaryotic  
33 organisms with little attention to the prokaryotes associated with them, but recent work has  
34 highlighted the key role that microbial biodiversity may play in determining the ecological  
35 response of ecosystems to warming (Bardgett & Putten, 2014; Bestion *et al.*, 2017).

36 Plant-microbe symbioses are widespread and ecologically important host-microbe  
37 associations. Plant-associated microbiomes have direct roles in ecosystem functioning through  
38 effects on carbon (Lu *et al.*, 2006; Knief *et al.*, 2012) and nitrogen cycles (Vile *et al.*, 2014;  
39 Moyes *et al.*, 2016). Plant microbial communities are structured by biotic factors (Bragina *et al.*,  
40 2012; Berg *et al.*, 2014; Edwards *et al.*, 2015) and abiotic factors (Bulgarelli *et al.*, 2012;  
41 Lundberg *et al.*, 2012; Carrell & Frank, 2014; Edwards *et al.*, 2015) and have been found to be  
42 susceptible to environmental perturbations such as drought (Santos-Medellín *et al.*, 2017),  
43 nitrogen deposition (Gschwendtner *et al.*, 2016), and salinity (Yang *et al.*, 2016). Plant  
44 microbiomes also affect host plant health and productivity (Berendsen *et al.*, 2012; Chaparro *et*  
45 *al.*, 2012; Berg *et al.*, 2014), with more productive and healthy plants supporting greater  
46 microbial diversity (van der Heijden *et al.*, 2008; Berendsen *et al.*, 2012; Bever *et al.*, 2013;  
47 Agler *et al.*, 2016; Delgado-Baquerizo *et al.*, 2016; Kolton *et al.*, 2017). Despite the importance  
48 of microbes to plant function and ecosystem processes, and the sensitivity of plant-microbial

49 symbioses to environmental disturbances, the response of plant associated-microbial diversity to  
50 climate warming is not well understood.

51 *Sphagnum* mosses play a large role in the global carbon cycle and are considered to be  
52 particularly vulnerable to climate change (McGuire *et al.*, 2009; Turetsky *et al.*, 2012). These  
53 bryophytes are inhabited by diverse microbes (Opelt *et al.*, 2007; Kostka *et al.*, 2016) with direct  
54 roles in the carbon cycle through methane oxidation (Raghoebarsing *et al.*, 2005; Kip *et al.*, 2010;  
55 Bragina *et al.*, 2013a), as well as other important ecosystem functions (Kostka *et al.*, 2016) such as  
56 nitrogen fixation (Bragina *et al.*, 2011, 2013b, 2014; Vile *et al.*, 2014; Warren *et al.*, 2017)(Bragina  
57 *et al.*, 2011, 2013a, 2014; Vile *et al.*, 2014; Warren *et al.*, 2017) that enables plant growth under  
58 nitrogen-limited conditions characteristic of the bogs where these mosses are found. Warming  
59 experiments have demonstrated that elevated temperature causes a reduction of *Sphagnum* biomass  
60 (Turetsky *et al.*, 2012). Moreover a recent study demonstrated elevated temperature may have both  
61 negative and positive impacts on *Sphagnum* microbial functional groups, which may destabilize  
62 carbon cycling in peatlands (Jassey *et al.*, 2013), but the effect of temperature on the community  
63 composition and diversity of *Sphagnum* microbiomes remains unknown.

64 In this study, we investigated the impact of experimental warming on the microbial  
65 community associated with *Sphagnum*. The objective of this study was to quantify changes in the  
66 abundance, diversity, and community composition of *Sphagnum* microbiomes with increased  
67 temperatures in the Spruce and Peatland Responses Under Changing Environments (SPRUCE)  
68 experiment (Hanson *et al.*, 2017) which provided in situ field warming treatments from ambient to  
69 +9°C at the S1-Bog of the Marcell Experimental Forest in northern Minnesota (Kolka *et al.*, 2011).  
70 The study focused on the nitrogen-fixing (diazotroph) functional guild that enables plant growth  
71 under the extreme nutrient-limited conditions characteristic of ombrotrophic bog ecosystems  
72 (Limpens & Heijmans, 2008; Larmola *et al.*, 2014; Vile *et al.*, 2014).

73

## 74 **Materials and Methods**

### 75 *Experimental site and warming experiment*

76 The SPRUCE experiment at the S1 bog on the Marcell Experimental Forest (Hanson *et al.*, 2017)  
77 employs a whole-ecosystem warming approach to produce nominal warming treatments of +0,  
78 +2.25, +4.5, +6.75 and +9 °C for a *Picea mariana* – *Sphagnum* spp. raised bog ecosystem. The  
79 experiment includes ten 12-m diameter plots with open-top enclosures (enclosed) and two ambient  
80 12-m diameter plots without enclosures (non-enclosed). Briefly, the warming methodology  
81 combining air warming with deep-peat-heating from mild electrical resistance heaters to produce  
82 target warming levels superimposed over the natural diurnal and seasonal variability (Hanson *et al.*  
83 2017). The experiment is located in the S1-Bog on the Marcell Experimental Forest (Kolka *et al.*,  
84 2011). The S1 Bog is an acidic and nutrient-deficient ombrotrophic *Sphagnum*-dominated peatland  
85 bog (surface pH $\leq$ 4.0). The average means of annual precipitation and air temperature are 768 mm  
86 and 3.3°C respectively (Sebestyen *et al.*, 2011).

### 87 *Sampling*

88 To characterize the *Sphagnum* microbiome responses to warming, individual *Sphagnum* stems  
89 were randomly collected within each plot in June 2016 following continuous whole-ecosystem  
90 warming initiated in August of 2015. Samples were overnight shipped on ice to Oak Ridge National  
91 laboratory. Upon arrival, a subset of samples was shipped on ice overnight to Georgia Institute of  
92 Technology for ARA and the remaining plants were immediately pulverized with sterile mortar and  
93 pestle in liquid nitrogen for DNA extraction.

94

### 95 *DNA extraction, PCR and DNA sequencing*

96 To characterize the abundance and community composition of *Sphagnum* microbiomes, DNA  
97 was extracted from 50 mg of each pulverized *Sphagnum* sample using a MoBio PowerPlant Plant

98 Kit (MoBio, Carlsbad, CA, USA). Extracted DNA was frozen and shipped on dry ice to Georgia  
99 Institute of Technology for amplification and sequencing.

100 The diversity and composition of *Sphagnum* associated microbial communities was determined  
101 by applying a high-throughput sequencing-based protocol that targets PCR-generated amplicons  
102 from the V4 variable regions of the 16S rRNA gene using the primer set 515F (5'-  
103 GTGCCAGCMGCCGCGGTAA-3') and 806R (5'-GGACTACHVGGGTWTCTAAT-3') as  
104 previously described (Wilson *et al.*, 2016; Kolton *et al.*, 2017). The diversity and composition of  
105 diazotrophic communities were assessed by targeting *nifH* (encoding the nitrogenase reductase  
106 subunit) as a molecular marker for nitrogen-fixing microorganisms. Primers IGK3 (5'-  
107 GCIWTHHTAYGGIAARGGIGGIATHGGIAA-3') and DVV (5'-  
108 TIGCRAAICCCRCIAIACIACRTC-3') were employed to generate 396 bp PCR products (Gaby  
109 & Buckley, 2014). The 16A SSU rRNA and *nifH* amplicons were barcoded with unique 10-base  
110 barcodes (Fluidigm Corporation), and sequenced on an Illumina MiSeq2000 platform at the Georgia  
111 Institute of Technology following standard protocols (Caporaso *et al.*, 2012;  
112 <http://www.earthmicrobiome.org/emp-standard-protocols/16s/>; Gilbert *et al.*, 2010; Gaby *et al.*,  
113 2017, submitted).

114

#### 115 *Sequence processing and analysis*

116 First, Illumina-generated 16S SSU rRNA and *nifH* gene amplicon sequences were paired with  
117 PEAR (Zhang *et al.*, 2014) and primers were trimmed with the software Mothur v1.36.1 (Schloss *et al.*  
118 *et al.*, 2009). Resulting sequences were quality filtered using a Phred quality score Q30 and Q25 for  
119 16S SSU and *nifH* respectively using the standard QIIME 1.9.1 pipeline (Caporaso *et al.*, 2010).  
120 Sequences were clustered into operational taxonomic units (OTUs) by using UCLUST algorithm  
121 with a threshold of 97% identity. Representative sequences were aligned using PyNAST (Caporaso

122 *et al.*, 2010) against the Greengenes core set for 16S SSU and against *nifH* gene alignment  
123 (DeSantis *et al.*, 2006; Gaby & Buckley, 2014). Taxonomies of these high-quality sequences were  
124 annotated to the Greengenes database (release 13\_8) (DeSantis *et al.*, 2006) or a manually curated  
125 *nifH* database (Gaby & Buckley, 2014) using the RDP classifier (Wang *et al.*, 2007) with a  
126 minimum confidence threshold of 50%. The 16S SSU rRNA sequences classified as “chloroplast”  
127 or “mitochondria” were removed from the alignment. An approximately maximum-likelihood tree  
128 was constructed from the aligned of bacterial representative sequences, using FastTree (Price *et al.*,  
129 2009). Prior to conducting diversity analyses, OTUs were rarefied to 3500 reads per sample for 16S  
130 SSU rRNA amplicons and 1500 reads per sample for *nifH* amplicons. The OTU-based alpha  
131 diversity was calculated based on the total number of phylotype (observed richness) and on  
132 Shannon’s diversity index (H’). Faith’s phylogenetic diversity (PD) was calculated to assess  
133 phylogenetic based alpha diversity. The OTU-based beta diversity indices were estimated based on  
134 Bray–Curtis distances.

135 The Illumina-generated 16S SSU rRNA and *nifH* gene amplicon sequences have been  
136 deposited in the BioProject database, ([ncbi.nlm.nih.gov/bioproject](http://ncbi.nlm.nih.gov/bioproject)) under accession PRJNA407792  
137 and PRJNA407800 respectively.

138

### 139 *Quantitative PCR amplification*

140 All quantitative polymerase chain reaction assays were performed in triplicates using the  
141 StepOnePlus platform (Applied Biosystems, USA) and PowerUp SYBR Green Master Mix  
142 (Applied Biosystems, USA). Absolute quantification of 16S SSU rRNA and *nifH* genes were  
143 conducted with primer pairs 331F (5’-CCTACGGGAGGCAGCAGT-3’)/518R (5’-  
144 ATTACCGCGGCTGCTG-3’) and PolF (5’-TGCGAYCCSAARGCGBACTC-3’) /PolR (5’-  
145 ATSGCCATCATYTCRCCGGA-3’) respectively (Muyzer & Waal, 1993; Poly *et al.*, 2001). The



146 16S SSU rRNA quantification reaction was carried out in 20  $\mu$ l containing 7.8  $\mu$ l of PCR grade  
147 water, 0.1  $\mu$ l of each primer (final concentration 0.5  $\mu$ M) , 10  $\mu$ l of PowerUp SYBR Green  
148 Master Mix (Applied Biosystems, USA) and 2  $\mu$ l of sample DNA. The cycling program included 2  
149 min at 50  $^{\circ}$ C, 2 min at 95  $^{\circ}$ C, followed by 40 cycles of 95  $^{\circ}$ C for 15 s, 55  $^{\circ}$ C for 15 s and  
150 72  $^{\circ}$ C for 1 min. The *nifH* gene quantification reaction was carried out in 20  $\mu$ l containing 6.8  $\mu$ l  
151 of PCR grade water, 0.6  $\mu$ l of each primer (final concentration 0.3  $\mu$ M), 10  $\mu$ l of PowerUp  
152 SYBR Green Master Mix (Applied Biosystems, USA) and 2  $\mu$ l of sample DNA. The cycling  
153 program included 2 min at 50  $^{\circ}$ C, 2 min at 95  $^{\circ}$ C, followed by 45 cycles of 95  $^{\circ}$ C for 15 s,  
154 63  $^{\circ}$ C for 1 min. Amplification specificity was studied by melting curve analysis of the PCR  
155 products, performed by ramping the temperature to 95  $^{\circ}$ C for 15 s and back to 60  $^{\circ}$ C for 1 min,  
156 followed by increases of 0.15  $^{\circ}$ C s<sup>-1</sup> up to 95  $^{\circ}$ C. Melting curve calculation and determination of  
157 T<sub>m</sub> values were performed using the polynomial algorithm function of StepOnePlus Software  
158 (Applied Biosystems, USA). In all experiments, negative controls containing no template DNA were  
159 subjected to the same qPCR procedure to exclude or detect any possible DNA contamination.  
160 Standard curves were obtained with serial dilution of standard plasmids containing target  
161 *Escherichia coli* k12 16S rRNA or *Azotobacter vinelandii* *nifH* gene fragments as the insert. The  
162 abundance of standard plasmid inserts ranged from  $2.97 \times 10^3$  to  $2.97 \times 10^9$  (bacterial 16S SSU  
163 rRNA gene) or 24.2 to  $2.42 \times 10^6$  (*nifH* gene).

164

#### 165 *Acetylene reduction assay*

166 To determine the effect of warming on nitrogen fixation activity, fresh tissue from the ambient  
167 and warming plots exposed to the highest temperatures (+9 $^{\circ}$ C) were interrogated using the acetylene  
168 reduction assay (ARA) as previously described (Warren *et al.*, 2017). Briefly, samples of *Sphagnum*  
169 were collected from ambient enclosed and non-enclosed plots and +9 $^{\circ}$ C enclosed plots in triplicate

170 and stored at 4°C until the start of incubations. A 1.0-1.5 g sample of green-only *Sphagnum* was  
171 placed into 35 ml glass serum bottles, stoppered with black butyl stoppers, sealed with an aluminum  
172 crimp seal, and 10% headspace was replaced with 10% room air or with 10% C<sub>2</sub>H<sub>2</sub>. Controls that  
173 were not amended with C<sub>2</sub>H<sub>2</sub> did not produce detectable ethylene. All treatments were incubated for  
174 one week in the light at 25°C. A gas chromatograph with flame ionization detector (DRI Instruments,  
175 Torrance, CA, USA) equipped with a HayeSep N column was used to quantify ethylene (C<sub>2</sub>H<sub>4</sub>). The  
176 accumulation of C<sub>2</sub>H<sub>4</sub> was determined twice daily until C<sub>2</sub>H<sub>4</sub> production was linear (~3 days).  
177 Samples were dried at the end of incubations at 80°C for 48 hours to determine dry weight for  
178 normalization of ARA rates.

179

#### 180 *Data analysis*

181 Statistical analysis was conducted in R (R Core Team, 2015). Warming effects on microbiome  
182 community composition were assessed with a Spearman *Rho* test between warming treatments and a  
183 heatmap was generated from the relative abundance of distinct OTUs that showed significant  
184 differences ( $p < 0.05$ ) and had  $> 0.1\%$  relative abundance in at least a single treatment. General Linear  
185 Models (GLMs) were used to evaluate the effects of warming on microbial diversity measurements  
186 of enclosed plots. A Mann-Whitney test was used to compare diversity between ambient plots, with  
187 or without an enclosure structure. Beta diversity was visualized using non-metric multidimensional  
188 scaling ordination (NMDS) from Bray-Curtis similarity distances. Analysis of similarities  
189 (ANOSIM) and permutational multivariate analysis of variance (PERMANOVA), each with 999  
190 permutations, were used to determine if beta diversity differed significantly among treatments.

191

## 192 **Results**

193 *Response of microbiome abundance, community composition, and diversity to warming*

194 The overall microbial abundance as determined by qPCR did not vary by warming treatment  
195 ( $p=0.2$ ; Table 1).

196 **Table 1.** Effect of warming on bacterial and diazotroph gene abundances. Triplicate samples from  
197 duplicate plots of each warming treatment were used to calculate the average absolute abundance  
198 with standard error of bacterial (16S SSU rRNA) and diazotroph (*nifH*) gene abundance of  
199 *Sphagnum* bacteria.

| Assay                                                                                        | +0°C         | +2.25°C      | +4.5°C       | +6.75°C      | +9°C         |
|----------------------------------------------------------------------------------------------|--------------|--------------|--------------|--------------|--------------|
| Bacterial 16S SSU rRNA gene abundance<br>(10 <sup>8</sup> per g <i>Sphagnum</i> tissue)      | 15.18 (3.86) | 14.58 (2.79) | 9.56 (2.71)  | 8.83 (4.08)  | 9.37 (1.55)  |
| Diazotroph <i>nifH</i> rRNA gene abundance<br>(10 <sup>8</sup> per g <i>Sphagnum</i> tissue) | 0.05 (0.03)  | 0.03 (0.004) | 0.03 (0.003) | 0.03 (0.008) | 0.02 (0.002) |

200

201 The *Sphagnum* microbiome communities were dominated by *Proteobacteria* (62%) and  
202 *Acidobacteria* (17%), with smaller contributions from candidate division WPS-2 (4%),  
203 *Cyanobacteria* (4%), *Bacteroidetes*, (3%) *Verrucomicrobia* (2%), and *Actinobacteria* (1%) with  
204 *Cyanobacteria* varying across warming treatments though not significant (Fig. 1). The  
205 *Proteobacteria* were dominated by the order *Rhodospirillales* (33%) followed by *Caulobacetales*  
206 (7%), *Xanthomonadales* (8%), and *Burkholderiales* (3%). Despite the dominance in major phyla and  
207 genera groups across treatment, several OTUs varied significantly across warming treatment (Table  
208 S1). *Cyanobacteria* in the *Nostocaceae* family, OTU 278041 most similar to *Nostoc sp.* and OTU  
209 4242238 most similar to *Cylindrospermum sp.*, increased in relative abundance from 0.4 to 4.1%  
210 and from 0 to 1%, respectively, across all warming treatments ( $p=0.04$ ). Warming treatments had a  
211 varied effect on *Acetobacteraceae* with relative abundance decreasing in +2.25°C and +4.5°C  
212 treatments but returning to similar abundances in +6.75 and +9°C treatments.

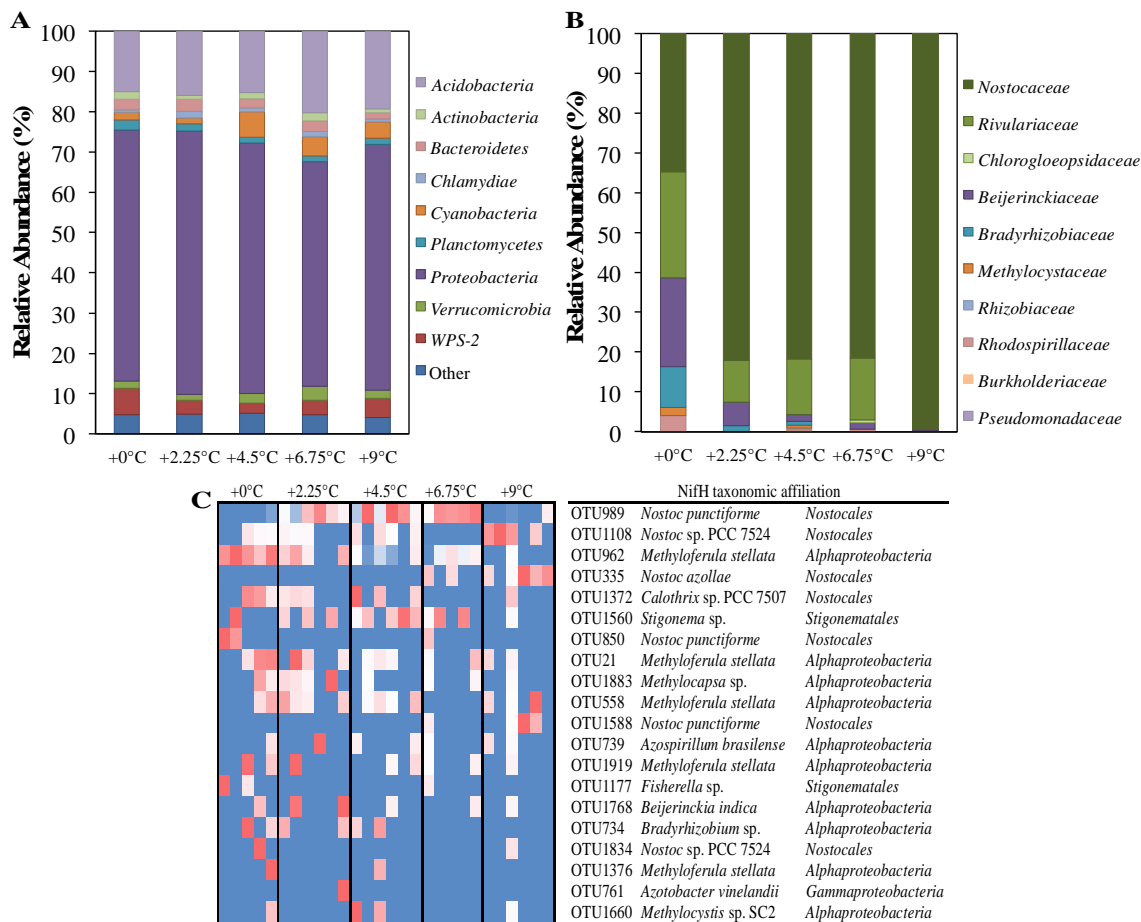

213

214 **Figure 1.** Effect of warming on overall microbial and diazotroph community composition in  
 215 *Sphagnum* microbiomes. Relative abundance of 16S SSU rRNA or nifH gene sequences was  
 216 determined at various taxonomic levels from triplicate samples collected in duplicate enclosures for  
 217 each treatment plot. Average relative abundance of 16S SSU rRNA gene amplicons (A) at the  
 218 phylum level and nifH gene amplicons (B) at the family level from each warming treatment. A  
 219 heatmap was generated of top the 20 *nifH* phylotypes with BLAST taxonomic family and species  
 220 identity (C). For each OTU, the highest abundance is indicated by dark red, intermediate is white,  
 221 and lowest abundance is blue with a color gradient for the remaining values.

222

223 The richness and phylogenetic diversity of *Sphagnum* microbiomes decreased with warming.  
224 Observed richness and Shannon index decreased with warming ( $p<0.05$ ), while phylogenetic  
225 diversity decreased with warming treatment but was only significant at  $p=0.08$  (Fig. 2, Table 2).  
226 *Sphagnum* bacterial communities were structured by warming treatments ( $p<0.003$ ) with Bray-  
227 Curtis distance similarity higher within treatment than between treatments (Fig. S1). Percent  
228 similarity for all samples was 52% (standard deviation = 5%) with a range of 31-65% similarity.  
229 ( $R^2=0.3, p=0.004$ ).

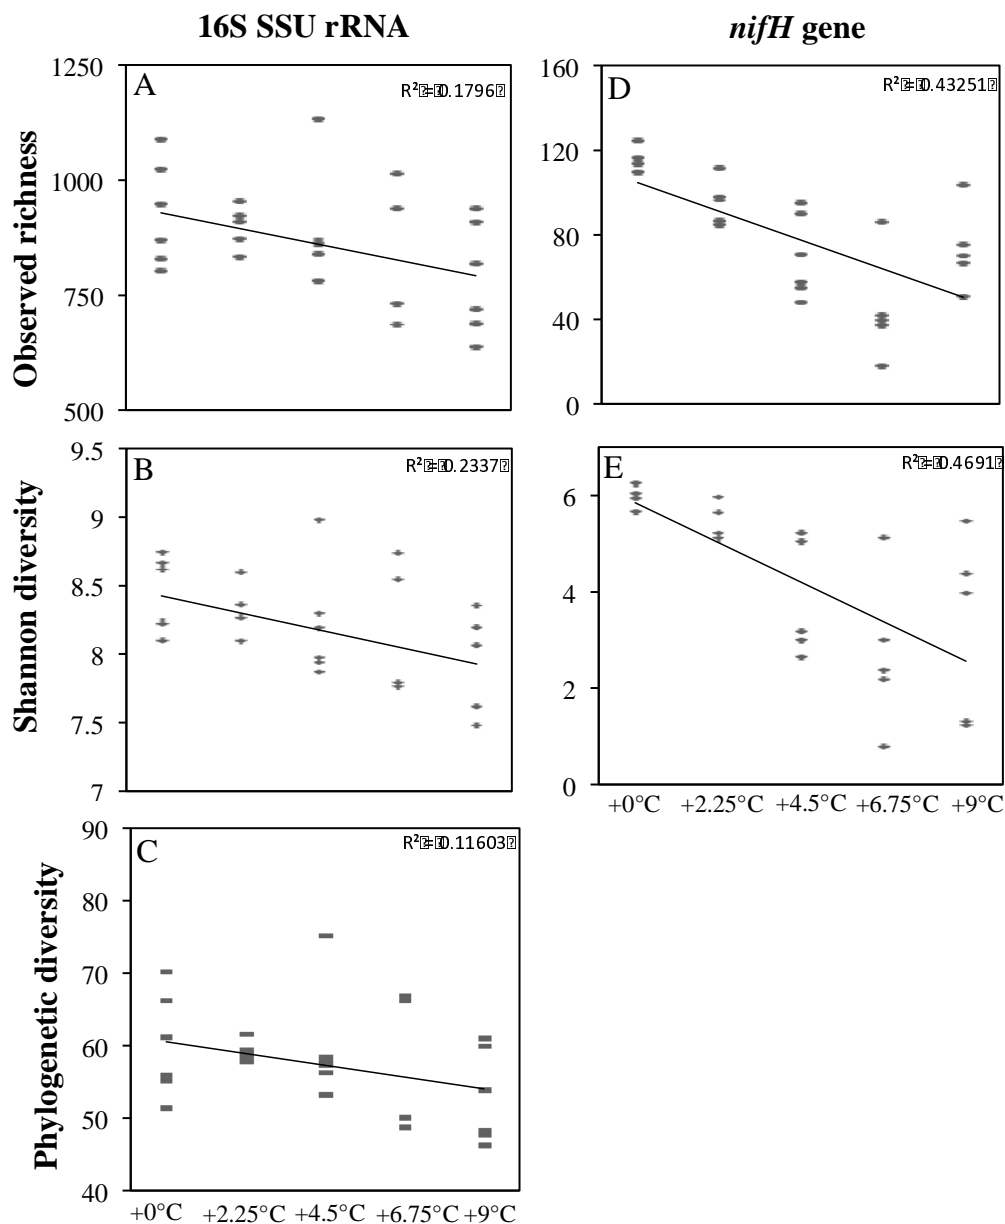

230 **Figure 2.** Effect of warming on alpha diversity of *Sphagnum* bacterial and diazotroph communities.  
231 Triplicate samples collected in duplicate enclosures for each treatment plot were used to calculate  
232 observed Operational Taxonomic Units (OTUs) (A and D), Shannon's diversity (B and F), and  
233 phylogenetic diversity (C) of 16S SSU rRNA gene (A-C) sequences rarefied to 3500 sequences per  
234 sample and *nifH* gene (D and F) sequences rarefied to 1500 sequences per sample.

235

236 **Table 2:** Effect of warming on the alpha diversity of *Sphagnum* bacteria. General Linear Models  
237 (GLMs) were used to evaluate the effects of warming on microbial diversity measurements of  
238 enclosed plots. Triplicate samples from duplicate plots of each warming treatment were used to  
239 measure observed OTU richness, Shannon's diversity, and Faith's phylogenetic diversity of  
240 *Sphagnum* bacterial 16S SSU rRNA genes across warming enclosure treatment plots. Significance  
241 metrics are indicated in bold ( $p < 0.05$ ).

242

|                              | <b>Diversity metric</b>           | <b>F</b> | <b>p</b>    |
|------------------------------|-----------------------------------|----------|-------------|
| <i>16S SSU<br/>rRNA gene</i> | Observed richness                 | 5.47     | <b>0.03</b> |
|                              | Shannon's diversity               | 7.62     | <b>0.01</b> |
|                              | Faith's phylogenetic<br>diversity | 3.28     | 0.08        |
| <i>nifH gene</i>             | Observed richness                 | 4.89     | <b>0.03</b> |
|                              | Shannon's diversity               | 4.70     | <b>0.04</b> |

243

244

245 *Response of diazotroph abundance, diversity, community composition and function to warming*

246 The abundance of diazotrophs as determined by qPCR of *nifH* genes significantly decreased  
247 ( $p=0.004$ ) with increasing temperature (Table 1). All *nifH* gene profiles were dominated by the  
248 phyla *Cyanobacteria* (60-100%) and *Proteobacteria* (0.5-40%) with *Cyanobacteria* increasing in  
249 abundance and *Proteobacteria* decreasing with warming treatments. Abundant members of the

250 *Cyanobacteria* phylum were comprised of *Nostocaceae* (25-99%), *Rivulariaceae* (0-27%), and  
251 *Chlorogloeopsdidaceae* (0-0.7%), with *Nostocaceae* becoming more dominant with warming (Fig.  
252 1). The *Rhizobiales* (0.1-35%) and *Rhodospirillales* (0-4%) were detected in abundance from the  
253 *Proteobacteria* phylum, with relative abundance decreasing across warming treatments. To provide  
254 greater resolution into shifts in diazotroph populations, an OTU heatmap was generated from the top  
255 20 OTUs of each treatment (Fig. 1). Notably, ambient warming plots were largely dominated by  
256 sequences most similar to the genera *Methyloferula* (17-40%) and *Calothrix* (0-32%) which both  
257 decreased across warming treatments: +2.25°C (0-25%), +4.5°C (0-7%), +6.75°C (0-6%), and +9°C  
258 (0-3%). With increased warming, sequences closely related to the genus *Nostoc* became more  
259 dominant though different *Nostoc* species dominated across each temperature treatment. Sequences  
260 most similar to *Nostoc punctiforme* dominated the +2.25°C (20-80%), +4.5°C (26-88%), and  
261 +6.75°C (46-83%) treatments while +9°C was dominated by *Nostoc* sp. PCC7524 (0-100%).

262 Warming reduced the richness and diversity of the diazotroph community ( $p < 0.05$ , Table 2),  
263 although each treatment did not respond equally. When compared to +0°C, diazotroph richness at  
264 +2.25°C and + 4.5°C decreased by 30% and 54%, respectively, while richness in the +6.75°C and  
265 +9°C plots only decreased by 14% richness (Fig. 2, Table S2). Shannon indices followed a similar  
266 pattern with a reduction in diversity of 27% in the +2.25°C plots, 52% in the + 4.5°C plots, 18% in  
267 the 6.75°C plots and only 3% in the +9°C plots (Fig. 2). The diazotroph community was structured  
268 by temperature treatment in that samples from the same treatment clustered closer to one another  
269 than other treatments ( $R^2 = 0.3546$ ,  $p = 0.041$ ). However, the clustering was not incremental with  
270 diazotroph communities from 0°C and 9°C clustering closer to one another than with 6.75°C (Fig.  
271 S1).

272 Nitrogen fixation rates determined by ARA showed considerable variability within warming  
273 treatments, with some samples showing no detectable activity while others had rates as high as 172

274 nmol g<sup>-1</sup> hr<sup>-1</sup>. Average rates of nitrogen fixation decreased by ~50% from +0°C (47 ±9 nmol g<sup>-1</sup> hr<sup>-1</sup>)  
275 to +9°C (21 ± 6 nmol g<sup>-1</sup> hr<sup>-1</sup>), but the decline was only significant at  $p=0.1$ , due to variation  
276 between replicates (Fig. 3).

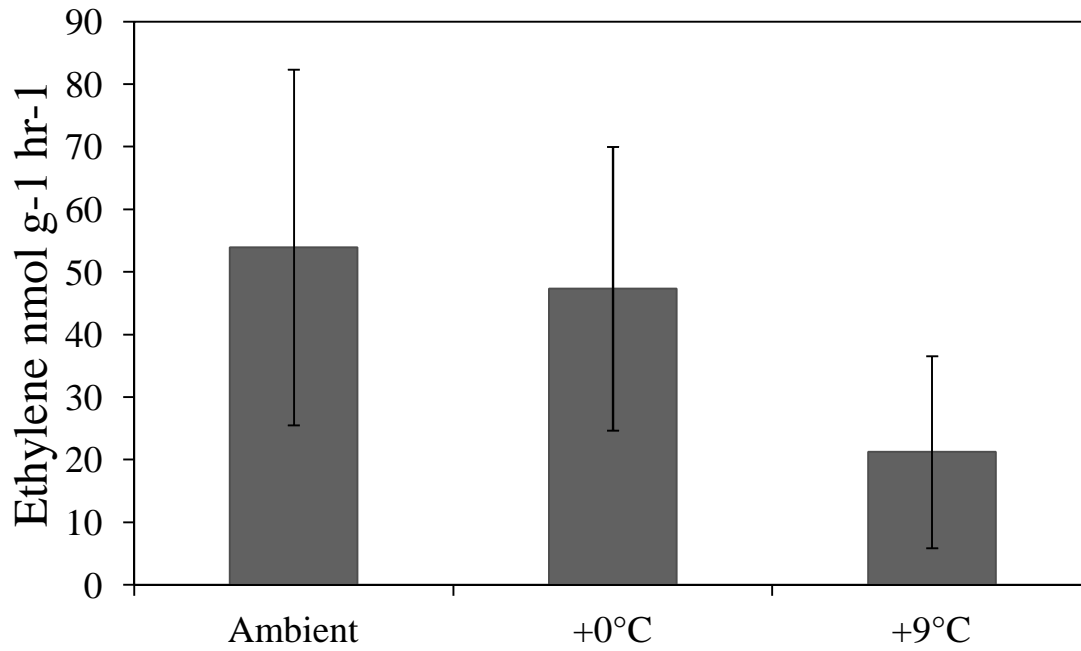

277

278 **Figure 3.** Effect of warming on nitrogenase activity. Triplicate samples from duplicate plots of  
279 enclosed ambient (0°C) and +9°C and non-enclosed ambient (ambient) treatments were used to  
280 measure potential nitrogenase activity with the acetylene reduction assay. Error bars represent 1  
281 standard deviation.

282

### 283 *Experimental enclosure affect*

284 To test if the presence of the experimental structure had a significant impact on *Sphagnum*  
285 general bacterial and diazotroph community composition and diversity, we measured 16S SSU  
286 rRNA and *nifH* genes of *Sphagnum* in ambient plots without an enclosure (ambient) and ambient  
287 plots with an enclosure warmed at +0°C above outside ambient conditions. We found that the  
288 enclosure had no statistical effect on 16S SSU rRNA and *nifH* gene composition, abundance,



289 diversity, richness or evenness (Figure S2, Tables S1, S2). Temperature did not significantly change  
290 community structure for either 16S SSU rRNA ( $R^2=0.02$ ,  $p=0.4$ ) or *nifH* genes ( $R^2=0.01$ ,  $p=0.6$ ).

291

## 292 **Discussion**

293 Determining the potential effects of climate drivers such as temperature on *Sphagnum*  
294 microbiomes is an important step toward effectively predicting the response of ecosystem function  
295 in ombrotrophic bogs to climate change. Here we demonstrate that temperature strongly influences  
296 general microbial and diazotroph community structure and diversity. Additionally, *Sphagnum*  
297 microbiome communities from ambient plots without enclosure were not significantly different in  
298 microbiome or diazotroph composition, abundance, or diversity, than *Sphagnum* microbiome  
299 communities in plots with enclosures, indicating that differences between temperature treatments  
300 were not an artifact of the experimental warming structure.

301

### 302 *Warming effects on overall microbiome communities*

303 The *Proteobacteria*, *Acidobacteria*, and *Cyanobacteria* dominated all samples, and have been  
304 found to dominate *Sphagnum* in other bog systems (Bragina et al., 2014). Despite consistent  
305 dominance by the same phyla, overall community structure differed by warming treatments, likely  
306 due to variation at a lower taxonomic level. We did see variation in species within bacterial families,  
307 possibly as a result of differential temperature optima of bacterial species. Overall, observed  
308 richness, diversity and phylogenetic diversity were negatively correlated with temperature.  
309 Phylogenetic diversity is a divergence based method that has been described as more powerful than  
310 qualitative measurements given the correlation of 16S SSU rRNA similarity and phenotypic  
311 similarities in microbial key features such as metabolic capabilities or other functions (Lozupone &  
312 Knight, 2008). This would suggest that while we see a reduction in overall phylotype counts, we

313 also see a reduction in metabolic capabilities.

314 A reduction of microbial diversity may make ecosystems more susceptible to environmental  
315 perturbations and when considering additional perturbations such as N deposition or different  
316 precipitation patterns, these communities may be even more impacted (Aanderud *et al.*, 2013). Here  
317 we found a reduction of richness and diversity in both the general microbial community and  
318 diazotroph community. Indeed a reduction of richness and evenness of microbial communities in  
319 other ecosystems such as soil or rhizosphere, were associated with a decrease in ecosystem  
320 functioning such as nutrient cycling (Philippot *et al.*, 2013; Wagg *et al.*, 2014), plant productivity  
321 (Bell *et al.*, 2005; van der Heijden *et al.*, 2008; Lau & Lennon, 2011; Fierer *et al.*, 2013) and plant  
322 resilience against pathogen invasion (Jousset *et al.*, 2011; Mendes *et al.*, 2011). Moreover, reduction  
323 in microbial diversity is frequently associated with reduced activation of plant defense systems  
324 (Mendes *et al.*, 2011, 2013; Berendsen *et al.*, 2012). Additionally, *Sphagnum* mosses have been  
325 found to harbor potential latent plant pathogens and in many organisms disease outbreaks are  
326 dependent on the abundance of pathogens and the diversity of microbiomes (Bragina *et al.*, 2011;  
327 Elad & Pertot, 2014; Tout *et al.*, 2015). Alternatively, a reduction in diversity could correspond to a  
328 loss of pathogenic taxa, which might be beneficial to host plants. Therefore, further study will be  
329 needed to determine the specific ecosystem functions that are mediated by the *Sphagnum*  
330 microbiome and impacted by warming.

331

332 *Warming effects on diazotroph communities*

333 Nitrogen is essential to the growth and maintenance of *Sphagnum* plants and previous research  
334 revealed highly specific and diverse diazotrophs (Bragina *et al.*, 2013a)(Bragina *et al.*, 2013a) are a  
335 major source of N in *Sphagnum*-dominated peatlands (Lindo *et al.*, 2013; Larmola *et al.*, 2014; Vile  
336 *et al.*, 2014; Novak *et al.*, 2016). In corroboration of patterns in overall microbiome communities,

337 diazotroph diversity and abundance were negatively correlated with temperature. This suggests that  
338 the reduction of microbial diversity may lead to a reduction of functional potential within the  
339 diazotroph functional guild. Within the diazotroph community, we found a shift in community  
340 composition with elevated temperature leading to a community dominated by primarily by *Nostoc*  
341 and void of diazotrophic methanotrophs. In addition, another filamentous cyanobacterium,  
342 *Stigonema*, was shown to decrease in relative abundance across temperature treatment to below  
343 detection in the +9°C treatment. Interestingly, *Nostoc* has been described as “cheaters” in the feather  
344 moss microbiome as it dominated the cyanobacterial community but had low *nifH* gene expression  
345 and thus not providing much nitrogen to the host. Conversely, *Stigonema* made up less than 29% of  
346 the cyanobacterial community but accounted for the majority of *nifH* gene expression suggesting  
347 *Stigonema* is responsible for the majority of fixed nitrogen (Warshan *et al.*, 2016). Though it is  
348 possible an observed reduction in nitrogen fixation may be attributed to the increase in the presence  
349 of a “cheater” and/or disruption of supportive metabolic pathways it cannot be concluded from our  
350 data that *Nostoc* is a cheater in our system. Concurrent with an increase in *Nostoc* relative  
351 abundance we found a decrease in diazotroph absolute abundance indicating that *Nostoc* may not be  
352 increasing in abundance but rather other microbial populations, such as the methanotrophs, are  
353 dropping out of the community.

354

### 355 *Diazotroph function*

356 Nitrogen fixation activity and temperature were negatively correlated which may be due to plant-  
357 specific tolerance to water stress and desiccation given that nitrogen fixation associated with moss is  
358 influenced by moisture (Zielke *et al.*, 2002; Sorensen *et al.*, 2006; Sorensen & Michelsen, 2011).  
359 Additionally, oxygen level, photosynthetic activity (Warren *et al.*, 2017), and phosphorous (Rousk  
360 *et al.*, 2017) or nitrogen availability (Kox *et al.*, 2016) have also been found to limit diazotrophy in

361 *Sphagnum* (Warren *et al.*, 2017). However, we observed a reduction in diazotroph absolute  
362 abundance indicating diazotrophs were not inactive but rather undetectable with our methods in  
363 elevated temperature treatments. Alternatively, this may be attributed to the diazotroph optimal  
364 temperature for nitrogen fixation (Gundale *et al.*, 2012) or a disruption in microbiome composition.  
365 The nitrogenase enzyme commonly contains molybdenum (Rousk *et al.*, 2017; Warren *et al.*, 2017)  
366 as its cofactor but may contain vanadium or iron in its place (Miller & Eady, 1988). Thus the change  
367 across temperatures could be attributed to altered metal availability. With a reduction in nitrogen  
368 fixation, *Sphagnum* may become more reliant on nitrogen provided by non-associative diazotrophs  
369 such as bacteria in the pore water or below peat. However, if the *Sphagnum* associated microbes are  
370 susceptible to elevated temperature, diazotrophs in the water may be even more so. Additionally,  
371 *Sphagnum* competition for other sources of nitrogen may disrupt free-living microbial communities  
372 causing larger consequences at the ecosystem level.

373       Though we found a general pattern of a reduction in potential rates of nitrogen fixation, it is  
374 important to note that acetylene inhibits the enzyme methane monooxygenase and thus the  
375 diazotrophy of methanotrophs. A recent study calibrated ARA with  $^{15}\text{N}$  incorporation and found a  
376 conversion factor of 3.9 for  $^{15}\text{N}_2$ -to-ARA in the same bog as our experiment, indicating the  
377 presence of diazotrophic methanotrophs that were inhibited by acetylene (Warren *et al.*, 2017). In  
378 our study, the use of the conversion factor is inappropriate given the demonstration of an altered  
379 diazotroph community. While it is possible we have underestimated diazotroph activity, our  
380 observations of decreased nitrogen fixation activity with warming are supported by a decline in  
381 diazotroph abundance and the relative abundance of diazotrophic methanotrophs.

382       With warming induced reduction of diazotroph abundance and function, one might logically  
383 expect a decline in peatland ecosystems carbon storage capacity. The considerable accumulation  
384 of C as peat results from a long-term excess of Net Primary Productivity (NPP) of plants over peat

385 decomposition. In peatlands a simple mass balance demonstrates N-deposition alone does not  
386 account for the N needed to support the observed NPP (Wieder *et al.*, 2010). A recent study  
387 demonstrated diazotrophs may account for 12-25 times more N than from atmospheric inputs alone,  
388 accenting the important link between diazotrophy and NPP (Vile *et al.*, 2014). *Sphagnum* has  
389 demonstrated differential NPP response to warming (Aerts *et al.*, 2006) but no studies have  
390 examined the *Sphagnum* microbial community and diazotroph responses to warming. Here we  
391 present data that suggests warming may disrupt the diazotroph community and function, which  
392 ultimately may reduce NPP or the accumulation of peat and therefore may be an important  
393 component to include in future *Sphagnum* and peatland response studies.

394 Microbial associates play an important role in *Sphagnum* health and growth as well as bog  
395 ecosystem functioning. In this study, we conducted a warming experiment to elucidate the  
396 temperature effects on *Sphagnum* microbiomes. We propose that climate warming may alter  
397 microbiome function as a result of decreased biodiversity. The consequences of decreased functional  
398 potential are not clear and merits future studies to determine how the alteration of overall  
399 microbiome and diazotroph function may scale to the ecosystem level. Such knowledge will provide  
400 a more comprehensive understanding of how climate may impact the future function of *Sphagnum*  
401 dominated bog ecosystems.

402

#### 403 **Acknowledgements**

404

405 The experiment were maintained as part of the SPRUCE project and supported by the U.S.

406 Department of Energy's Office of Science, Biological and Environmental Research (DOE BER).

407 Oak Ridge National Laboratory is managed by UT-Battelle, LLC, for the U.S. Department of

408 Energy under contract DE-AC05-00OR22725. Sample collection, processing and manuscript

409 writing was supported by the Laboratory Directed Research and Development Program of Oak

410 Ridge National Laboratory, managed by UT-Battelle, LLC, for the U. S. Department of Energy.  
411 Sequencing was supported by U.S. DOE BER under award numbers DE-SC0007144 and DE-  
412 SC0012088.

413

#### 414 **References**

- 415 Aanderud Z, Jones S, Schoolmaster D (2013) Sensitivity of soil respiration and microbial  
416 communities to altered snowfall. *Soil Biology and Biochemistry*, **57**, 217–227.
- 417 Aerts R, Cornelissen JHC, Dorrepaal E (2006) Plant performance in a warmer world: general  
418 responses of plants from cold, northern biomes and the importance of winter and spring events.  
419 *Plant Ecology*, **182**, 65–77.
- 420 Agler M, Ruhe J, Kroll S, Morhenn C, Kim S (2016) Microbial hub taxa link host and abiotic  
421 factors to plant microbiome variation. *PLoS*, **14**.
- 422 Bardgett R, Putten W van der (2014) Belowground biodiversity and ecosystem functioning. *Nature*,  
423 **515**, 505–511.
- 424 Bell T, Newman JA, Silverman BW, Turner SL, Lilley AK (2005) The contribution of species  
425 richness and composition to bacterial services. *Nature*, **436**, 1157–1160.
- 426 Berendsen RLR, Pieterse CCMJ, Bakker PAHMP (2012) The rhizosphere microbiome and plant  
427 health. *Trends in Plant Science*, **17**, 478–486.
- 428 Berg G, Grube M, Schloter M, Smalla K (2014) The plant microbiome and its importance for plant  
429 and human health. *Frontiers in Microbiology*, **5**, 491.
- 430 Bestion E, Teyssier A, Richard M, Clobert J, Cote J, Stevens V (2015) Live Fast, Die Young:  
431 Experimental Evidence of Population Extinction Risk due to Climate Change (ed Mace GM).  
432 *PLOS Biology*, **13**, e1002281.
- 433 Bestion E, Jacob S, Zinger L, Gesu L Di (2017) Climate warming reduces gut microbiota diversity

- 434 in a vertebrate ectotherm. *Nature Ecology & Evolution*, **1**, 161.
- 435 Bever JD, Broadhurst LM, Thrall PH (2013) Microbial phylotype composition and diversity predicts  
436 plant productivity and plant-soil feedbacks (ed van der Putten W). *Ecology Letters*, **16**, 167–  
437 174.
- 438 Bragina A, Maier S, Berg C, Müller H, Chobot V, Hadacek F, Berg G (2011) Similar diversity of  
439 alphaproteobacteria and nitrogenase gene amplicons on two related *Sphagnum* mosses.  
440 *Frontiers in microbiology*, **2**, 275.
- 441 Bragina A, Berg C, Cardinale M, Shcherbakov A (2012) *Sphagnum* mosses harbour highly specific  
442 bacterial diversity during their whole lifecycle. *The ISME Journal*, **6**, 802–813.
- 443 Bragina A, Berg C, Müller H, Moser D, Berg G (2013a) Insights into functional bacterial diversity  
444 and its effects on Alpine bog ecosystem functioning. *Scientific reports*, **3**, 1955.
- 445 Bragina A, Cardinale M, Berg C, Berg G (2013b) Vertical transmission explains the specific  
446 Burkholderia pattern in *Sphagnum* mosses at multi-geographic scale. *Frontiers in*  
447 *Microbiology*, **4**.
- 448 Bragina A, Oberauer-Wappis L, Zachow C, Halwachs B, Thallinger GG, Müller H, Berg G (2014)  
449 The *Sphagnum* microbiome supports bog ecosystem functioning under extreme conditions.  
450 *Molecular Ecology*, **23**, 4498–4510.
- 451 Bulgarelli D, Rott M, Schlaeppi K, Themaat E van (2012) Revealing structure and assembly cues  
452 for Arabidopsis root-inhabiting bacterial microbiota. *Nature*, **488**, 91–95.
- 453 Caporaso JG, Kuczynski J, Stombaugh J et al. (2010) QIIME allows analysis of high-throughput  
454 community sequencing data. *Nature methods*, **7**, 335–336.
- 455 Caporaso JG, Lauber CL, Walters WA et al. (2012) Ultra-high-throughput microbial community  
456 analysis on the Illumina HiSeq and MiSeq platforms. *The ISME Journal*, **6**, 1621–4.
- 457 Carrell AA, Frank AC (2014) *Pinus flexilis* and *Picea engelmannii* share a simple and consistent

- 458 needle endophyte microbiota with a potential role in nitrogen fixation. *Frontiers in*  
459 *Microbiology*, **5**.
- 460 Chaparro JM, Sheflin AM, Manter DK, Vivanco JM (2012) Manipulating the soil microbiome to  
461 increase soil health and plant fertility. *Biology and Fertility of Soils*, **48**, 489–499.
- 462 Delgado-Baquerizo M, Maestre F, Reich P (2016) Microbial diversity drives multifunctionality in  
463 terrestrial ecosystems. *Nature Communications*, **7**, 10541.
- 464 DeSantis TZ, Hugenholtz P, Larsen N et al. (2006) Greengenes, a chimera-checked 16S rRNA gene  
465 database and workbench compatible with ARB. *Applied and environmental microbiology*, **72**,  
466 5069–5072.
- 467 Edwards J, Johnson C, Santos-Medellín C et al. (2015) Structure, variation, and assembly of the  
468 root-associated microbiomes of rice. *Proceedings of the National Academy of Sciences of the*  
469 *United States of America*, **112**, E911-20.
- 470 Elad Y, Pertot I (2014) Climate Change Impacts on Plant Pathogens and Plant Diseases. *Journal of*  
471 *Crop Improvement*, **28**, 99–139.
- 472 Fierer N, Ladau J, Clemente JC et al. (2013) Reconstructing the Microbial Diversity and Function of  
473 Pre-Agricultural Tallgrass Prairie Soils in the United States. *Science*, **342**.
- 474 Gaby J, Buckley D (2014) A comprehensive aligned nifH gene database: a multipurpose tool for  
475 studies of nitrogen-fixing bacteria. *Database*.
- 476 Gilbert JA, Meyer F, Antonopoulos D et al. (2010) Meeting report: the terabase metagenomics  
477 workshop and the vision of an Earth microbiome project. *Standards in Genomic Sciences*, **3**,  
478 243–8.
- 479 Gschwendtner S, Engel M, Lueders T, Buegger F, Schloter M (2016) Nitrogen fertilization affects  
480 bacteria utilizing plant-derived carbon in the rhizosphere of beech seedlings. *Plant and Soil*,  
481 **407**, 203–215.



- 482 Gundale MJ, Nilsson M, Bansal S, Jäderlund A (2012) The interactive effects of temperature and  
483 light on biological nitrogen fixation in boreal forests. *New Phytologist*, **194**, 453–463.
- 484 Hanson PJ, Riggs JS, Nettles WR et al. (2017) Attaining Whole-Ecosystem Warming Using Air and  
485 Deep Soil Heating Methods with an Elevated CO<sub>2</sub> Atmosphere 2.3. *Biogeosciences*, **14**, 861–  
486 883.
- 487 van der Heijden MGA, Bardgett RD, van Straalen NM (2008) The unseen majority: soil microbes as  
488 drivers of plant diversity and productivity in terrestrial ecosystems. *Ecology Letters*, **11**, 296–  
489 310.
- 490 Jassey VE, Chiapusio G, Binet P et al. (2013) Above- and belowground linkages in *Sphagnum*  
491 peatland: Climate warming affects plant-microbial interactions. *Global Change Biology*, **19**.
- 492 Jousset A, Schulz W, Scheu S, Eisenhauer N (2011) Intraspecific genotypic richness and relatedness  
493 predict the invasibility of microbial communities. *The ISME journal*, **5**, 1108–14.
- 494 Kip N, van Winden JF, Pan Y et al. (2010) Global prevalence of methane oxidation by symbiotic  
495 bacteria in peat-moss ecosystems. *Nature Geoscience*, **3**, 617–621.
- 496 Knief C, Delmotte N, Chaffron S et al. (2012) Metaproteogenomic analysis of microbial  
497 communities in the phyllosphere and rhizosphere of rice. *The ISME Journal*, **6**, 1378–1390.
- 498 Kolka, R., Sebestyén, S., Verry, E.S., Brooks K (2011) *Peatland biogeography and watershed*  
499 *hydrology at the Marcell Experimental Forest*. CRC Press.
- 500 Kolton M, Graber ER, Tsehansky L, Elad Y, Cytryn E (2017) Biochar-stimulated plant performance  
501 is strongly linked to microbial diversity and metabolic potential in the rhizosphere. *New*  
502 *Phytologist*, **213**, 1393–1404.
- 503 Kostka JE, Weston DJ, Glass JB, Lilleskov EA, Shaw AJ, Turetsky MR (2016) The *Sphagnum*  
504 microbiome: New insights from an ancient plant lineage. *New Phytologist*, **211**, 57–64.
- 505 Kox MAR, Lüke C, Fritz C et al. (2016) Effects of nitrogen fertilization on diazotrophic activity of

- 506 microorganisms associated with *Sphagnum magellanicum*. *Plant and Soil*, **406**, 83–100.
- 507 Laforest-Lapointe I, Paquette A, Messier C, Kembel SW (2017) Leaf bacterial diversity mediates  
508 plant diversity and ecosystem function relationships. *Nature Publishing Group*.
- 509 Larmola T, Leppänen SM, Tuittila E-S, Aarva M, Merilä P, Fritze H, Tirola M (2014)  
510 Methanotrophy induces nitrogen fixation during peatland development. *Proceedings of the*  
511 *National Academy of Sciences of the United States of America*, **111**, 734–9.
- 512 Lau JA, Lennon JT (2011) Evolutionary ecology of plant-microbe interactions: soil microbial  
513 structure alters selection on plant traits. *New Phytologist*, **192**, 215–224.
- 514 Liang J, Crowther TW, Picard N et al. (2016) Positive biodiversity-productivity relationship  
515 predominant in global forests. *Science*, **354**.
- 516 Limpens J, Heijmans MMPD (2008) Swift recovery of *Sphagnum* nutrient concentrations after  
517 excess supply. *Oecologia*, **157**, 153–61.
- 518 Lindo Z, Nilsson MC, Gundale MJ (2013) Bryophyte-cyanobacteria associations as regulators of the  
519 northern latitude carbon balance in response to global change. *Global Change Biology*, **19**,  
520 2022–2035.
- 521 Lozupone CA, Knight R (2008) Species divergence and the measurement of microbial diversity.  
522 *FEMS microbiology reviews*, **32**, 557–78.
- 523 Lu Y, Rosencrantz D, Liesack W, Conrad R (2006) Structure and activity of bacterial community  
524 inhabiting rice roots and the rhizosphere. *Environmental Microbiology*, **8**, 1351–1360.
- 525 Lundberg D, Lebeis S, Paredes S, Yourstone S (2012) Defining the core *Arabidopsis thaliana* root  
526 microbiome. *Nature*, **488**, 86–90.
- 527 McGuire AD, Anderson LG, Christensen TR et al. (2009) Sensitivity of the carbon cycle in the  
528 Arctic to climate change. *Ecological Monographs*, **79**, 523–555.
- 529 Mendes R, Kruijt M, de Bruijn I et al. (2011) Deciphering the Rhizosphere Microbiome for Disease-

- 530           Suppressive Bacteria. *Science*, **332**.
- 531   Mendes R, Garbeva P, Raaijmakers JM (2013) The rhizosphere microbiome: significance of plant  
532           beneficial, plant pathogenic, and human pathogenic microorganisms. *FEMS Microbiology*  
533           *Reviews*, **37**, 634–663.
- 534   Miller RW, Eady RR (1988) Molybdenum and vanadium nitrogenases of *Azotobacter chroococcum*.  
535           Low temperature favours N<sub>2</sub> reduction by vanadium nitrogenase. *Biochemical Journal*, **256**.
- 536   Moyes AB, Kueppers LM, Pett-Ridge J, Carper DL, Vandehey N, O’Neil J, Frank AC (2016)  
537           Evidence for foliar endophytic nitrogen fixation in a widely distributed subalpine conifer. *New*  
538           *Phytologist*, **210**, 657–668.
- 539   Muyzer G, Waal E De (1993) Profiling of complex microbial populations by denaturing gradient gel  
540           electrophoresis analysis of polymerase chain reaction-amplified genes coding for 16S rRNA.  
541           *Applied and Environmental Microbiology*, **59**, 695.
- 542   Novak M, Jackova I, Curik J et al. (2016) Contrasting  $\delta^{15}\text{N}$  Values of Atmospheric Deposition and  
543           *Sphagnum* Peat Bogs: N Fixation as a Possible Cause. *Ecosystems*, **19**, 1037–1050.
- 544   Opelt K, Chobot V, Hadacek F, Schönmann S, Eberl L, Berg G (2007) Investigations of the  
545           structure and function of bacterial communities associated with *Sphagnum* mosses.  
546           *Environmental Microbiology*, **9**, 2795–2809.
- 547   Parmesan C (2006) Ecological and Evolutionary Responses to Recent Climate Change. *Annual*  
548           *Review of Ecology, Evolution, and Systematics*, **37**, 637–669.
- 549   Philippot L, Spor A, Hénault C et al. (2013) Loss in microbial diversity affects nitrogen cycling in  
550           soil. *The ISME journal*, **7**, 1609–19.
- 551   Poly F, Monrozier L, Bally R (2001) Improvement in the RFLP procedure for studying the diversity  
552           of nifH genes in communities of nitrogen fixers in soil. *Research in Microbiology*, **152**, 95–  
553           103.

- 554 Price MN, Dehal PS, Arkin AP (2009) FastTree: Computing Large Minimum Evolution Trees with  
555 Profiles instead of a Distance Matrix. *Molecular Biology and Evolution*, **26**, 1641–1650.
- 556 R Core Team (2015) R: A Language and Environment for Statistical Computing.
- 557 Raghoebarsing AA, Smolders AJP, Schmid MC et al. (2005) Methanotrophic symbionts provide  
558 carbon for photosynthesis in peat bogs. *Nature*, **436**, 1153–1156.
- 559 Rousk K, Degboe J, Michelsen A, Bradley R, Bellenger J-P (2017) Molybdenum and phosphorus  
560 limitation of moss-associated nitrogen fixation in boreal ecosystems. *New Phytologist*, **214**, 97–  
561 107.
- 562 Santos-Medellín C, Edwards J, Liechty Z, Nguyen B, Sundaresan V (2017) Drought Stress Results  
563 in a Compartment-Specific Restructuring of the Rice Root-Associated Microbiomes. *mBio*, **8**,  
564 e00764-17.
- 565 Schloss P, Westcott S, Ryabin T (2009) Introducing mothur: open-source, platform-independent,  
566 community-supported software for describing and comparing microbial communities. *Applied  
567 and Environmental Microbiology*, **75**, 7537.
- 568 Sebestyen S, Dorrance C, Olson D (2011) Long-term monitoring sites and trends at the Marcell  
569 Experimental Forest. *hydrology at the ...*
- 570 Sorensen PL, Michelsen A (2011) Long-term warming and litter addition affects nitrogen fixation in  
571 a subarctic heath. *Global Change Biology*, **17**, 528–537.
- 572 Sorensen P, Jonasson S, Michelsen A (2006) Nitrogen fixation, denitrification, and ecosystem  
573 nitrogen pools in relation to vegetation development in the subarctic. *Arctic, Antarctic, and  
574 Alpine Research*, **38**, 263–272.
- 575 Tilman D, Reich PB, Isbell F (2012) Biodiversity impacts ecosystem productivity as much as  
576 resources, disturbance, or herbivory. *Proceedings of the National Academy of Sciences of the  
577 United States of America*, **109**, 10394–7.

- 578 Tout J, Siboni N, Messer LF et al. (2015) Increased seawater temperature increases the abundance  
579 and alters the structure of natural *Vibrio* populations associated with the coral *Pocillopora*  
580 *damicornis*. *Frontiers in microbiology*, **6**, 432.
- 581 Turetsky MR, Bond-Lamberty B, Euskirchen E, Talbot J, Frohling S, McGuire AD, Tuittila E-S  
582 (2012) The resilience and functional role of moss in boreal and arctic ecosystems. *New*  
583 *Phytologist*, **196**, 49–67.
- 584 Vile MAMA, Wieder R, Živković T et al. (2014) N<sub>2</sub>-fixation by methanotrophs sustains carbon and  
585 nitrogen accumulation in pristine peatlands. *Biogeochemistry*, **121**, 317–328.
- 586 Wagg C, Bender SF, Widmer F, van der Heijden MGA (2014) Soil biodiversity and soil community  
587 composition determine ecosystem multifunctionality. *Proceedings of the National Academy of*  
588 *Sciences of the United States of America*, **111**, 5266–70.
- 589 Wang Q, Garrity GM, Tiedje JM, Cole JR (2007) Naive Bayesian classifier for rapid assignment of  
590 rRNA sequences into the new bacterial taxonomy. *Applied and Environmental Microbiology*,  
591 **73**, 5261–7.
- 592 Warren MJ, Lin X, Gaby JC et al. (2017) Molybdenum-based diazotrophy in a *Sphagnum* peatland  
593 in northern Minnesota. *Applied and environmental microbiology*, **83**, e01174-17.
- 594 Warshan D, Bay G, Nahar N, Wardle DA, Nilsson M-C, Rasmussen U (2016) Seasonal variation in  
595 *nifH* abundance and expression of cyanobacterial communities associated with boreal feather  
596 mosses. *The ISME Journal*.
- 597 Wieder KR, Vitt DH, Burke-Scoll M, Scott KD, House M, Vile MA (2010) Nitrogen and sulphur  
598 deposition and the growth of *Sphagnum fuscum* in bogs of the Athabasca Oil Sands Region,  
599 Alberta. *Journal of Limnology*, **69**, 161–170.
- 600 Wilson R, Hopple A, Tfaily M et al. (2016) Stability of peatland carbon to rising temperatures.  
601 *Nature Communications*, **7**, 13723.

- 602 Yang H, Hu J, Long X, Liu Z, Rengel Z (2016) Salinity altered root distribution and increased  
603 diversity of bacterial communities in the rhizosphere soil of Jerusalem artichoke. *Scientific*  
604 *reports*, **6**, 20687.
- 605 Zhang J, Kobert K, Flouri T, Stamatakis A (2014) PEAR: a fast and accurate Illumina Paired-End  
606 reAd mergeR. *Bioinformatics*, **30**, 614–620.
- 607 Zielke M, Ekker A, Olsen R, Spjelkavik S (2002) The influence of abiotic factors on biological  
608 nitrogen fixation in different types of vegetation in the High Arctic, Svalbard. *Arctic, Antarctic,*  
609 *and Alpine Research*, **34**, 293.
- 610
- 611
